# Supplementary material for: Toward Rigorous Methodologies for Strengthening Causal Inference in the Association Between Gender-Affirming Care and Transgender Individuals’ Mental Health: Response to Letters
Source: Atypon-hosted journal article supplement (doi:10.1176/appi.ajp.2020.20050599), 2020-08-01
Supplement: appi.ajp.2020.20050599.ds001.pdf [file appi.ajp.2020.20050599.ds001.pdf]

Online supplement for Bränström and Pachankis, Toward Rigorous Methodologies for Strengthening Causal Inference in the Association Between Gender-Affirming Care and Transgender Individuals' Mental Health: Response to Letters. *Am J Psychiatry* (doi: 10.1176/appi.ajp.2020.20050599)

**Table S1.** Demographic characteristics of the Swedish population diagnosed with gender incongruence diagnosis between 2005 and 2015, and a matched comparison group.

|                                           | Individuals<br>diagnosed with<br>gender incongruence<br><i>n</i> =2,679 | Matched control group <sup>a</sup><br>(i.e., individuals not diagnosed<br>with gender incongruence)<br><i>n</i> =2,679 |
|-------------------------------------------|-------------------------------------------------------------------------|------------------------------------------------------------------------------------------------------------------------|
| <b>Mean age - years (SD)</b>              | 31.5 (14.0)                                                             | 32.4 (14.5)                                                                                                            |
| <b>Legal gender – <i>n</i> (%)</b>        |                                                                         |                                                                                                                        |
| Male                                      | 1,284 (47.9)                                                            | 1326 (49.5)                                                                                                            |
| Female                                    | 1,395 (52.1)                                                            | 1353 (50.5)                                                                                                            |
| <b>Level of education – <i>n</i> (%)</b>  |                                                                         |                                                                                                                        |
| University education                      | 809 (30.2)                                                              | 891 (33.3)                                                                                                             |
| <b>Total household income – mean (SD)</b> |                                                                         |                                                                                                                        |
| Mean yearly income in tSEK <sup>b</sup>   | 298.4 (301.0)                                                           | 470.0 (387.3)                                                                                                          |
| <b>Urbanicity – <i>n</i> (%)</b>          |                                                                         |                                                                                                                        |
| Larger city                               | 1,102 (41.1)                                                            | 1513 (56.5)                                                                                                            |
| Smaller city                              | 867 (32.4)                                                              | 620 (23.1)                                                                                                             |
| Rural community                           | 710 (26.5)                                                              | 546 (20.4)                                                                                                             |
| <b>Country of birth – <i>n</i> (%)</b>    |                                                                         |                                                                                                                        |
| Sweden                                    | 2,214 (82.6)                                                            | 2175 (81.2)                                                                                                            |
| Other European country                    | 164 (6.1)                                                               | 183 (6.8)                                                                                                              |
| Outside of Europe                         | 301 (11.2)                                                              | 321 (12.0)                                                                                                             |

<sup>a</sup> The comparison group was matched on age, legal gender, education, and country of birth and drawn from the general population among individuals without a gender incongruence diagnosis.

<sup>b</sup> Swedish kronor, in thousands.

**Table S2.** Association between gender incongruence diagnosis and mood- and anxiety-related healthcare visits, antidepressant and anxiolytic prescriptions, and hospitalization after suicide attempt in 2015, among all individuals diagnosed with gender incongruence in Sweden between 2005 and 2015, and a matched comparison group.

|                                           | Individuals diagnosed with<br>gender incongruence<br>( <i>n</i> =2,679) |        | Matched control group <sup>a</sup><br>(i.e., individuals not diagnosed with<br>gender incongruence; <i>n</i> =2,679) |       | Odds ratio (95%<br>confidence interval) |               |
|-------------------------------------------|-------------------------------------------------------------------------|--------|----------------------------------------------------------------------------------------------------------------------|-------|-----------------------------------------|---------------|
|                                           | <i>n</i>                                                                | (%)    | <i>N</i>                                                                                                             | (%)   |                                         |               |
| <b>Psychiatric outpatient visits 2015</b> |                                                                         |        |                                                                                                                      |       |                                         |               |
| Any mood disorder                         | 250                                                                     | (9.3)  | 49                                                                                                                   | (1.8) | 5.52                                    | (4.05, 7.54)  |
| Any anxiety disorder                      | 197                                                                     | (7.4)  | 39                                                                                                                   | (1.5) | 5.37                                    | (3.79, 7.61)  |
| <b>Prescribed medication 2015</b>         |                                                                         |        |                                                                                                                      |       |                                         |               |
| Any antidepressant treatment              | 771                                                                     | (28.8) | 228                                                                                                                  | (8.5) | 4.34                                    | (3.70, 5.10)  |
| Any anxiolytic treatment                  | 449                                                                     | (16.8) | 158                                                                                                                  | (5.9) | 3.21                                    | (2.66, 3.88)  |
| <b>Inpatient visits 2015</b>              |                                                                         |        |                                                                                                                      |       |                                         |               |
| Hospitalization after suicide attempt     | 22                                                                      | (0.8)  | 4                                                                                                                    | (0.1) | 5.54                                    | (1.91, 16.09) |

<sup>a</sup> The comparison group was matched based on age, gender, education, and country of birth and drawn from the general population among individuals not diagnosed with a gender incongruence diagnosis.

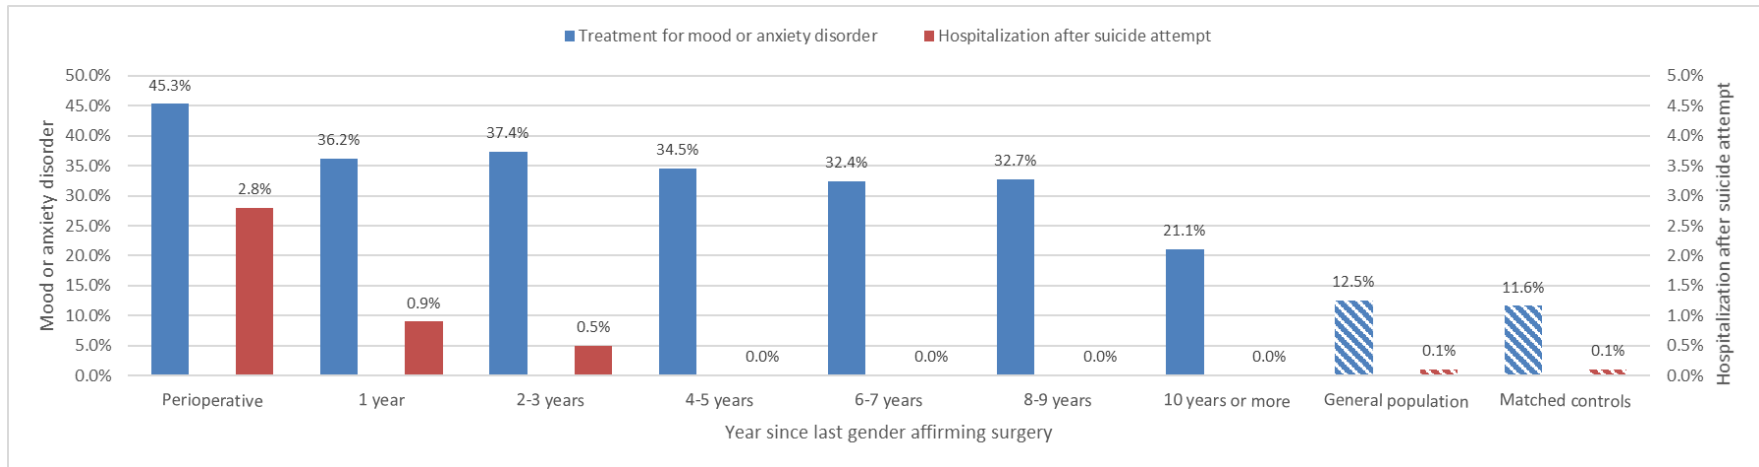

**Figure S1.** Prevalence of treatment for mood or anxiety disorders (healthcare visit or antidepressant or anxiolytic prescription) and hospitalization after suicide attempt in 2015 among individuals with a gender incongruence diagnosis, by number of years since last gender-affirming surgery, as well as prevalence in the general population and a comparison sample of individuals without a gender incongruence diagnosis matched for age, legal gender, education, and country of birth.
